# Supplementary material for: Gene Expression Mapping of Histone Deacetylases and Co-factors, and Correlation with Survival Time and 1H-HRMAS Metabolomic Profile in Human Gliomas
Source: PubMed Central journal article supplement (PMC4367156; doi:10.1038/srep09087), 2015-03-20
Supplement: srep09087-s1.pdf [file srep09087-s1.pdf]

## Supplemental information

Manuscript : **Gene Expression Mapping of Histone Deacetylases and Co-factors, and Correlation with Survival Time and 1H-HRMAS Metabolomic Profile in Human Gliomas**

By Nassim DALI-YOUCHEF, Sébastien FROELICH, François-Marie MOUSSALLIEH, Salvatore CHIBBARO, Georges NOËL, Izzie J. NAMER, Sami HEIKKINEN & Johan AUWERX.

**Table S1** : Human primers used for quantitative real-time PCR.

|                 | Forward 5' → 3'               | Reverse 5' → 3'                     |
|-----------------|-------------------------------|-------------------------------------|
| <i>18S</i>      | -GGG AGC CTG AGA AAC GGC-     | -GGT CGG GAG TGG GTA ATT TG-        |
| <i>HDAC1</i>    | -GGA AAT CTA TCG CCC TCA CA-  | -CTC GGA CTT CTT TGC ATG GT-        |
| <i>HDAC2</i>    | -GAC AGG GTC ATC CCA TGA AG-  | -GTC TTA TTG ACC GTA GAA ATT TGA T- |
| <i>HDAC3</i>    | -ACG TGG GCA ACT TCC ACT AC-  | -GAC TCT TGG TGA AGC CTT GC-        |
| <i>HDAC4</i>    | -AGC GTG AGC AAG ATC CTC AT-  | -GCC AAG TAC TCA GCG TCT CC-        |
| <i>HDAC5</i>    | -GTG ACA CCG TGT GGA ATG AG-  | -AGT CCA CGA TGA GGA CCT TG-        |
| <i>HDAC6</i>    | -AAG TAG GCA GAA CCC CCA GT-  | -GTG CTT CAG CCT CAA GGT TC-        |
| <i>HDAC7</i>    | -CCC AGC AAA CCT TCT ACC AA-  | -AAG CAG CCA GGT ACT CAG GA-        |
| <i>HDAC8</i>    | -GGT GAC GTG TCT GAT GTT GG-  | -AGC TCC CAG CTG TAA GAC CA-        |
| <i>HDAC9</i>    | -CCT TCG AAA AAC TGC CTC TG-  | -GAC CAG AGC CTG GAG AAC TG-        |
| <i>HDAC10</i>   | -TCC ACC CGA GTA CCT TTC AC-  | -GAT CCT GTG TAG CCC GTG TT-        |
| <i>HDAC11</i>   | -TCT TCC TCC CCA ACT TCC CTT- | -CTC CAC ACG CTC AAA CAG AA-        |
| <i>SIRT1</i>    | -GCA GAT TAG TAG GCG GCT TG-  | -TCT GGC ATG TCC CAC TAT CA-        |
| <i>SIRT2</i>    | -GAG GCC AGG ACA ACA GAG AG-  | -TAG AGA TTT GCT GGG GTT GG-        |
| <i>SIRT3</i>    | -CAT GAG CTG CAG TGA CTG GT-  | -GAG CTT GCC GTT CAA CTA GG-        |
| <i>SIRT4</i>    | -CAG CAA GTC CTC CTC TGG AC-  | -CCA GCC TAC GAA GTT TCT CG-        |
| <i>SIRT5</i>    | -TTC AAA GGC AGA AAC CAA CC-  | -CTA ATG CAA AAG CAG CCA CA-        |
| <i>SIRT6</i>    | -CCA AGT TCG ACA CCA CCT TT-  | -CGG ACG TAC TGC GTC TTA CA-        |
| <i>SIRT7</i>    | -CGC CAA ATA CTT GGT CGT CT-  | -GTG ATG CTC ATG TGG GTG AG-        |
| <i>PPARGC1A</i> | -CCT GCA TGA GTG TGT GCT CT-  | -GCA AAG AGG CTG GTC TTC AC-        |

|                 |                                 |                                 |
|-----------------|---------------------------------|---------------------------------|
| <i>PPARGC1B</i> | -AGT GGT GCC CAG AGA ACT CA-    | -CGA AGC TGA GGT GCA TGA TA-    |
| <i>NCOR1</i>    | -CAT TGC TAG GAG TGA GCA TGA-   | -TAG GTG GAA TCA CAG AGA GCT-   |
| <i>NCOR2</i>    | -TCA TCT ACG ACG AGA ACC GG-    | -ATT GTT TCC GAG CGT GAT TC-    |
| <i>NRIP1</i>    | -GTG GAA CAA AGG TCA TGA GTG A- | -CTC GAG AAT ACT GCT GCA AAT G- |
| <i>RB1</i>      | -CAG CAA GTG ATC AAC CTT CA-    | -ATT TCG ACA CAA CCC TGT CC-    |

**Table S2** : P-values of 18S normalized expression levels of HDACs and NR co-factors in different brain tumors versus control samples.  $p < 0.01$ , bold red;  $0.01 \leq p < 0.05$ , red;  $\geq 0.05$ , black.

*Class I HDACs*

| Tumor type | <i>HDAC1</i>    | <i>HDAC2</i> | <i>HDAC3</i>    | <i>HDAC8</i> |
|------------|-----------------|--------------|-----------------|--------------|
| GL         | <b>9.88E-06</b> | 5.49E-01     | <b>9.27E-06</b> | 3.61E-01     |
| ODII       | 9.29E-02        | 4.17E-01     | 1.97E-01        | 6.45E-01     |
| ODIII      | <b>4.43E-05</b> | 5.06E-02     | <b>3.28E-02</b> | 7.61E-01     |

*Class IV HDACs*

| Tumor type | <i>HDAC11</i>   |
|------------|-----------------|
| GL         | <b>7.96E-06</b> |
| ODII       | 7.05E-02        |
| ODIII      | <b>3.03E-03</b> |

*Class II HDACs*

| Tumor type | <i>HDAC4</i>    | <i>HDAC5</i>    | <i>HDAC6</i>    | <i>HDAC7</i>    | <i>HDAC9</i> | <i>HDAC10</i>   |
|------------|-----------------|-----------------|-----------------|-----------------|--------------|-----------------|
| GL         | 9.83E-01        | <b>7.97E-08</b> | <b>2.24E-04</b> | <b>5.00E-07</b> | 4.71E-01     | <b>1.12E-04</b> |
| ODII       | <b>2.09E-02</b> | 1.60E-01        | <b>1.64E-02</b> | 9.30E-02        | 7.93E-01     | 2.28E-01        |
| ODIII      | <b>1.46E-02</b> | <b>5.06E-03</b> | <b>1.05E-05</b> | <b>1.60E-04</b> | 4.08E-01     | <b>7.34E-06</b> |

*Class III HDACs*

| Tumor type | <i>SIRT1</i>    | <i>SIRT2</i> | <i>SIRT3</i>    | <i>SIRT4</i> | <i>SIRT5</i> | <i>SIRT6</i>    | <i>SIRT7</i> |
|------------|-----------------|--------------|-----------------|--------------|--------------|-----------------|--------------|
| GL         | 2.51E-01        | 9.11E-02     | <b>1.62E-02</b> | 6.65E-02     | 1.88E-01     | <b>1.63E-02</b> | 9.50E-02     |
| ODII       | <b>2.92E-02</b> | 3.99E-01     | 7.97E-01        | 1.00E-01     | 7.14E-01     | <b>5.21E-03</b> | 8.25E-01     |
| ODIII      | <b>8.55E-03</b> | 5.12E-01     | 2.70E-01        | 3.15E-01     | 8.15E-01     | <b>7.98E-04</b> | 1.62E-01     |

*Transcriptional co-factors*

| Tumor type | <i>PPARGC1A</i> | <i>PPARGC1B</i> | <i>NCOR1</i> | <i>NCOR2</i>    | <i>NRIP1</i> | <i>RB1</i>      |
|------------|-----------------|-----------------|--------------|-----------------|--------------|-----------------|
| GL         | <b>1.95E-02</b> | <b>8.01E-08</b> | 4.09E-01     | 9.11E-02        | 1.34E-01     | <b>2.38E-03</b> |
| ODII       | 3.84E-01        | <b>3.21E-02</b> | 9.50E-01     | 1.05E-01        | 4.77E-01     | 6.78E-02        |
| ODIII      | <b>1.93E-02</b> | <b>4.58E-06</b> | 1.93E-01     | <b>7.08E-05</b> | 1.67E-01     | <b>1.97E-03</b> |
